# Supplementary material for: Modern Technologies Providing a Full Cycle of Geo-Resources Development
Source: MDPI journal article supplement (doi:10.3390/resources12040050), 2023-04-11
Supplement: s1 [file s1]

## Article

# Modern Technologies Providing a Full Cycle of Geo-Resources Development

Cheynesh B. Kongar-Syuryun <sup>1,\*</sup>, Alexander V. Aleksakhin <sup>2</sup>, Evgeniya N. Eliseeva <sup>2</sup>, Anna V. Zhaglovskaya <sup>3</sup>, Roman V. Klyuev <sup>4</sup> and Denis A. Petrusevich <sup>5</sup>

<sup>1</sup> Mining Department, Saint-Petersburg Mining University, 21st Line, 2, 199106 St Petersburg, Russia

<sup>2</sup> Economics Department, National University of Science and Technology «MISiS», Leninsky Avenue, 4, 119991 Moscow, Russia

<sup>3</sup> Department of Industrial Management, College of Economics and Industrial Management Named after V.A. Romenets, National University of Science and Technology «MISiS», Leninsky Avenue, 4, 119991 Moscow, Russia

<sup>4</sup> Department of Technique and Technology of Mining and Oil and Gas Production, Moscow Polytechnic University, 38, B. Semenovskaya St., 107023 Moscow, Russia

<sup>5</sup> Higher Mathematics Chair, Institute of Artificial Intelligence, MIREA—Russian Technological University (RTU MIREA), Vernadsky Avenue, 78, 119454 Moscow, Russia

\* Correspondence: kongarsiuriun@gmail.com

## Supplementary Materials

**Table S1.** Content of valuable components in tailing dumps of the Southern Urals [33].

| Tailing Dumps of the Ore Processing Plants | Element Content |      |        |      |      |        |
|--------------------------------------------|-----------------|------|--------|------|------|--------|
|                                            | Copper          | Zinc | Sulfur | Iron | Gold | Silver |
|                                            |                 | %    |        |      | g/t  |        |
| Sibay                                      | 0,21            | 0,50 | 22,7   | 32,7 | 0,85 | 18,5   |
| Uchaly                                     | 0,22            | 0,63 | 23,1   | 29,5 | 0,6  | 8,5    |
| Buribay                                    | 0,45            | 0,21 | 25,6   | 23,1 | 1,2  | 10,3   |
| Guy                                        | 0,3             | 0,23 | 26,6   | 13,9 | 0,7  | 4,0    |

**Table S2.** Chemical composition (in %) of metallurgical slags [34].

| № | Metallurgical Plants       | SiO <sub>2</sub> | Al <sub>2</sub> O <sub>3</sub> | CaO  | MgO  | S   | SO <sub>3</sub> | MnO | Fe <sub>2</sub> O <sub>3</sub> | FeO | etc. |
|---|----------------------------|------------------|--------------------------------|------|------|-----|-----------------|-----|--------------------------------|-----|------|
| 1 | Chusovskoy                 | 31,1             | 10,2                           | 50,6 | 4,3  | 1,4 | 0,2             | -   | -                              | -   | 2,2  |
| 2 | Orsk-Khalilovo             | 34,5             | 8,5                            | 47,2 | 3,1  | -   | 2,9             | 2,3 | 1,4                            | 1,9 | 0,5  |
| 3 | Chelyabinsk                | 39,6             | 9,3                            | 41,0 | 6,9  | 0,1 | 0,5             | 0,4 | -                              | -   | 2,2  |
| 4 | Mednogorsk                 | 37,0             | 12,1                           | 35,4 | 8,9  | 1,6 | 1,8             | 0,6 | -                              | -   | 2,6  |
| 5 | Cherepovetsk               | 30,9             | 11,1                           | 41,9 | 11,4 | 0,7 | 1,1             | -   | 0,5                            | 0,6 | 1,8  |
| 6 | West Siberian              | 33,7             | 17,1                           | 27,5 | 15,7 | 2,3 | -               | 1,2 | 0,9                            | -   | 1,6  |
| 7 | Nizhniy Tagil              | 35,3             | 16,8                           | 38,0 | 5,8  | 1,1 | -               | 0,7 | 0,9                            | -   | 1,4  |
| 8 | Novolipetsk                | 33,6             | 17,4                           | 40,0 | 5,9  | 1,7 | -               | 0,9 | -                              | 0,4 | 0,1  |
| 9 | Nizhniy Tagil <sup>1</sup> | 30,9             | 19,0                           | 29,9 | 9,7  | 0,5 | -               | 0,4 | 0,7                            | -   | 9,9  |

<sup>1</sup> Vanadium redistribution.

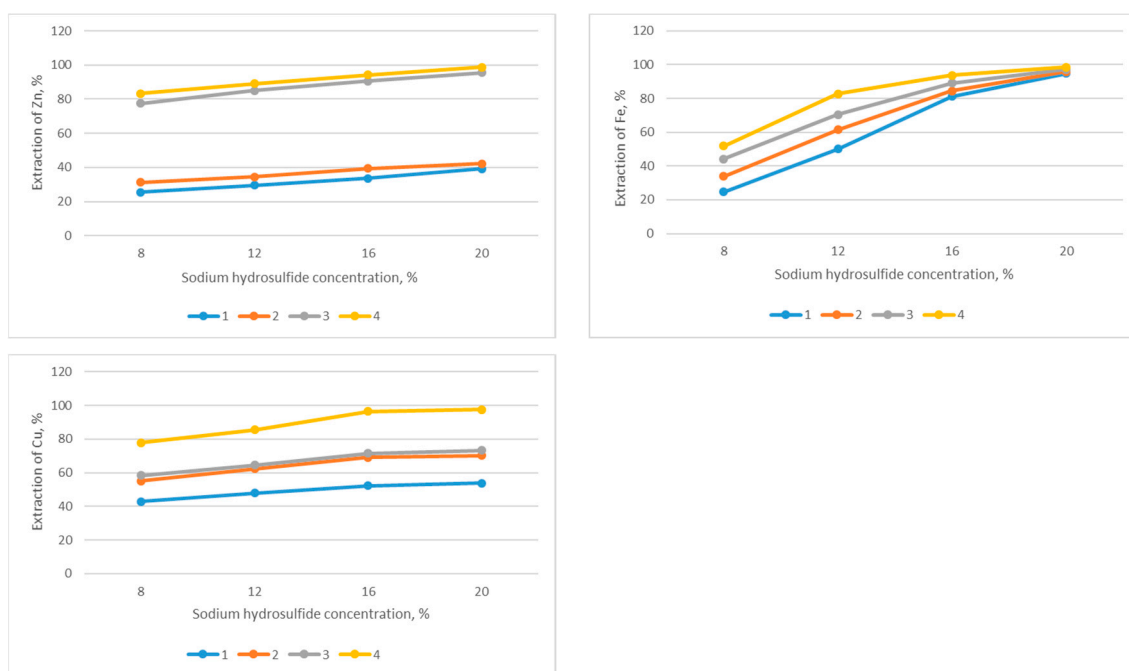

**Figure S1.** Dependence of the metals extraction from the concentration tailings on the concentration of sodium hydrosulfide in the work solution and on the activation method.

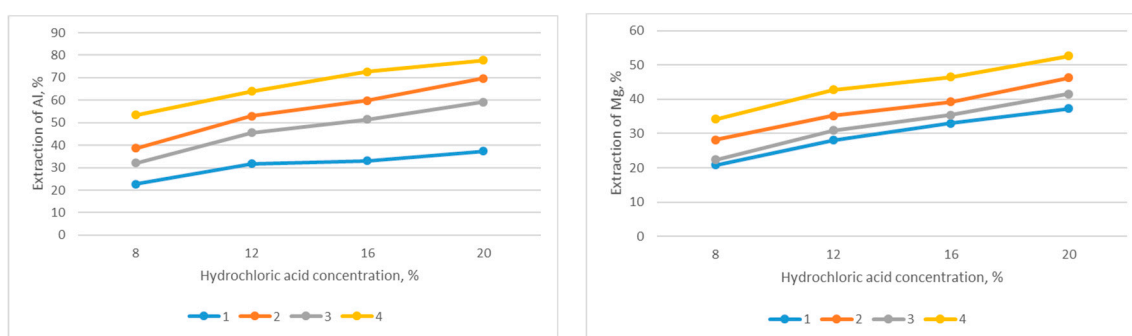

**Figure S2.** Dependence of metal extraction from metallurgical slags on the concentration of hydrochloric acid in the work solution and on the activation method.

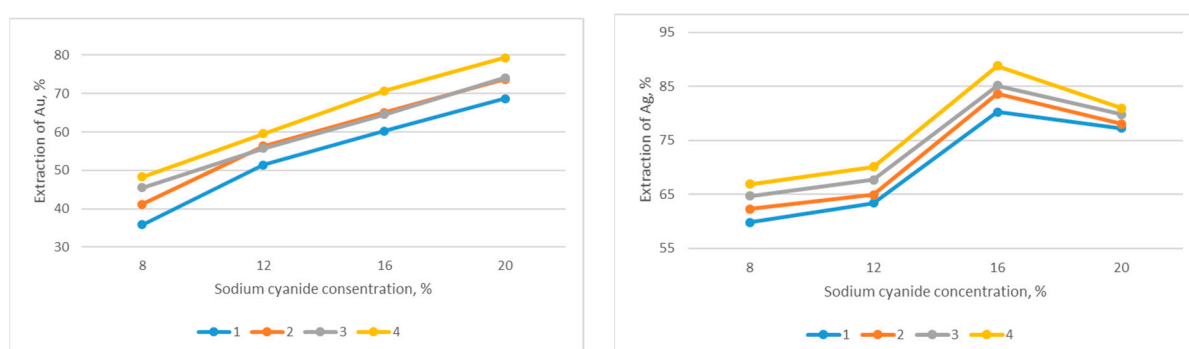

**Figure S3.** Dependence of the metal extraction from concentration tailings on the concentration of sodium cyanide in the work solution and on the activation method.
